# Supplementary material
Source: publisher figshare collection journal article supplement (https://acs.figshare.com/ndownloader/files/4400539)
Supplement: Supplementary file 1 [file 4400539]

## Supporting Information Available

### *Block-Copolymer Nanolithography*

For the fabrication of gold nanoparticle arrays glass coverslips were retracted from a toluene solution of PS-block-P2VP (Polymer Source Inc., Dorval, Canada) loaded with HAuCl<sub>4</sub> (Sigma) at a molar ratio of 0.5 followed by a reactive gas plasma process (TePla 100-E; 0.4 mbar O<sub>2</sub>; 150 W; 15 min, followed by 0.4 mbar H<sub>2</sub>; 150 W; 30 min). Interparticle spacing and standard deviation were determined using an ImageJ plug-in written by Philippe Girard, the standard error is < 1 nm for all substrates.

**Supplemental Table 1.** PS-*block*-P2VP polymers

| <b>diblock copolymer<br/>PS(x)-<i>b</i>-P2VP(y)</b> | <b>PS<br/>units</b> | <b>P2VP<br/>units</b> | <b>polydispersity<br/>M<sub>w</sub>/M<sub>n</sub></b> |
|-----------------------------------------------------|---------------------|-----------------------|-------------------------------------------------------|
| PS(25000)- <i>b</i> -<br>P2VP(15000)                | 240                 | 143                   | 1.05                                                  |
| PS(47000)- <i>b</i> -<br>P2VP(24000)                | 451                 | 228                   | 1.07                                                  |
| PS(110000)- <i>b</i> -<br>P2VP(52000)               | 1056                | 495                   | 1.15                                                  |
| PS(190000)- <i>b</i> -<br>P2VP(55000)               | 1824                | 523                   | 1.10                                                  |

**Supplemental Table 2.** Micellar solutions for BCMN

| <b>diblock<br/>copolymer<br/>PS(x)-<i>b</i>-P2VP(y)</b> | <b>polymer<br/>concentration<br/>[mg/mL]</b> | <b>loading rate <sup>[a]</sup></b> | <b>retraction<br/>velocity<br/>[mm/min]</b> | <b>interparticle spacing<br/>± standard deviation<br/>[nm] on the template</b> | <b>Figure</b> |
|---------------------------------------------------------|----------------------------------------------|------------------------------------|---------------------------------------------|--------------------------------------------------------------------------------|---------------|
|---------------------------------------------------------|----------------------------------------------|------------------------------------|---------------------------------------------|--------------------------------------------------------------------------------|---------------|

|                                   |                  |     |    |          |                         |
|-----------------------------------|------------------|-----|----|----------|-------------------------|
| PS(25000)- <i>b</i> -P2VP(15000)  | 8 <sup>[b]</sup> | 0.5 | 12 | 30 ± 6   | 3b, 7a-d                |
| PS(25000)- <i>b</i> -P2VP(15000)  | 5                | 0.5 | 16 | 40 ± 7   | 1a,b,d,e,f;<br>3b, 5a-d |
| PS(47000)- <i>b</i> -P2VP(24000)  | 5                | 0.5 | 20 | 40 ± 7   | 3b                      |
| PS(110000)- <i>b</i> -P2VP(52000) | 5                | 0.5 | 32 | 65 ± 8   | 3b, 7e                  |
| PS(110000)- <i>b</i> -P2VP(52000) | 5                | 0.5 | 20 | 70 ± 8   | 3b, 2a,b<br>6a,b        |
| PS(190000)- <i>b</i> -P2VP(55000) | 2                | 0.5 | 8  | 120 ± 15 | 3b, 4a-d                |

[a] The loading rate is the molar ratio between H<sub>2</sub>AuCl<sub>4</sub> and all P2VP units

[b] Here, the solvent was *p*-xylene instead of toluene

### ***XPS measurements***

XPS were collected with a Leybold MAX 200 photoelectron spectrometer equipped with an Mg K<sub>α</sub> radiation source (1253.6 eV) operated at 200 W. The emitted photoelectrons were detected by a multi-channel detector at a pass energy of 96 eV for the survey spectra and 48 eV for narrow-scanned spectra, respectively, at a take-off angle of 90° relative to the surface. During the measurements, the base pressure was lower than 6 × 10<sup>-9</sup> mbar. Binding energies were calibrated with respect to the Si2p(+IV) peak at 103.3 eV and spectra were corrected using Shirley background subtraction [S1].

### ***Supplemental References***

[S1] D. A. Shirley, *Phys. Rev. B* **1972**, 5, 4709.

*Supplemental Figures*

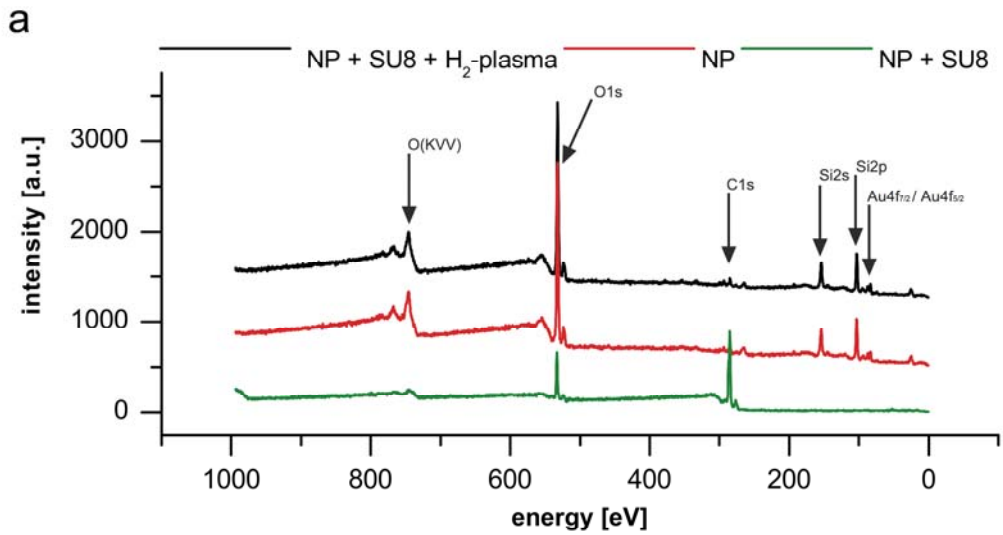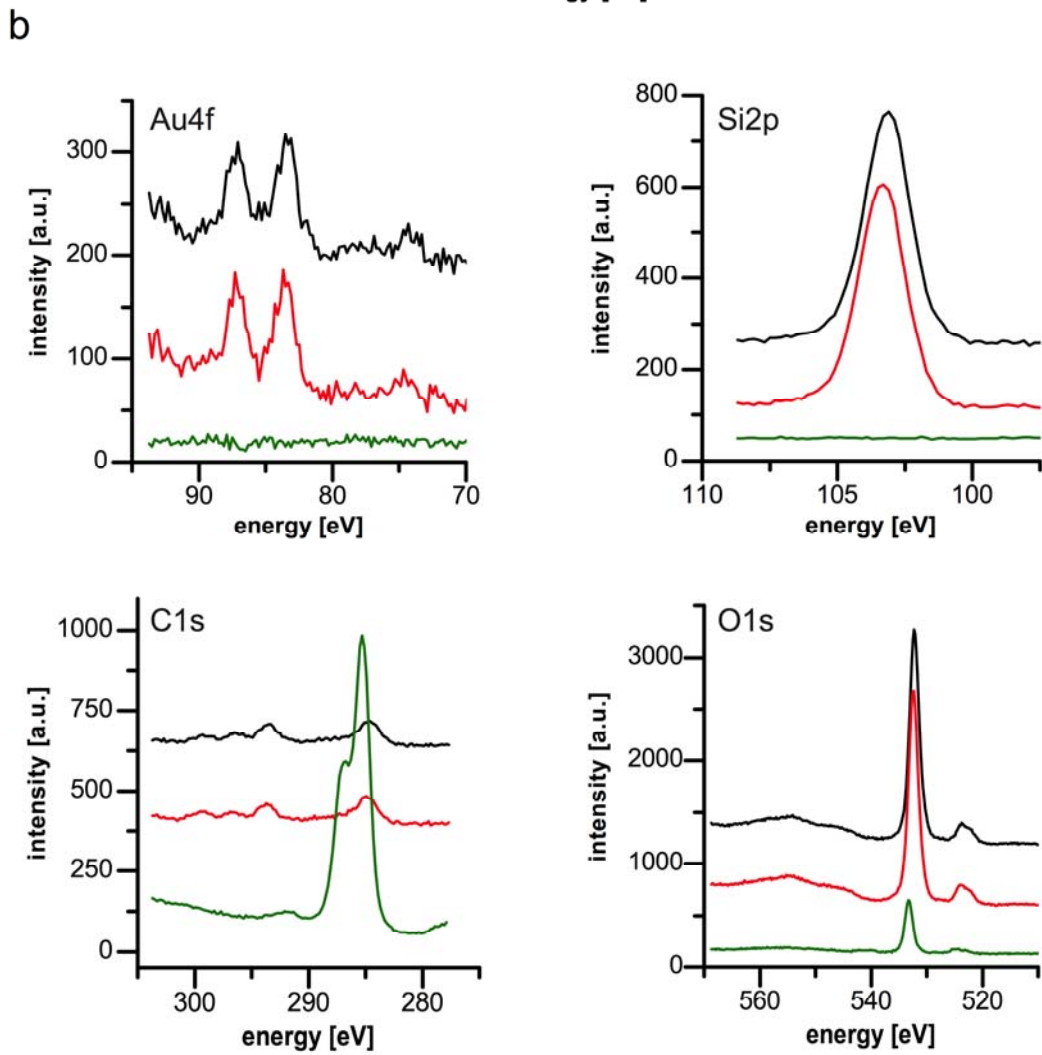

**Supplemental Figure 1.** XPS spectra of the SU8 removal process. The spectra show SU8 covered gold nanoparticles on glass before removal (green), after removal (black) and without SU8 (red). (a) low-resolution survey spectrum, (b) detailed spectra of Au4f, Si2p, C1s and O1s regions.

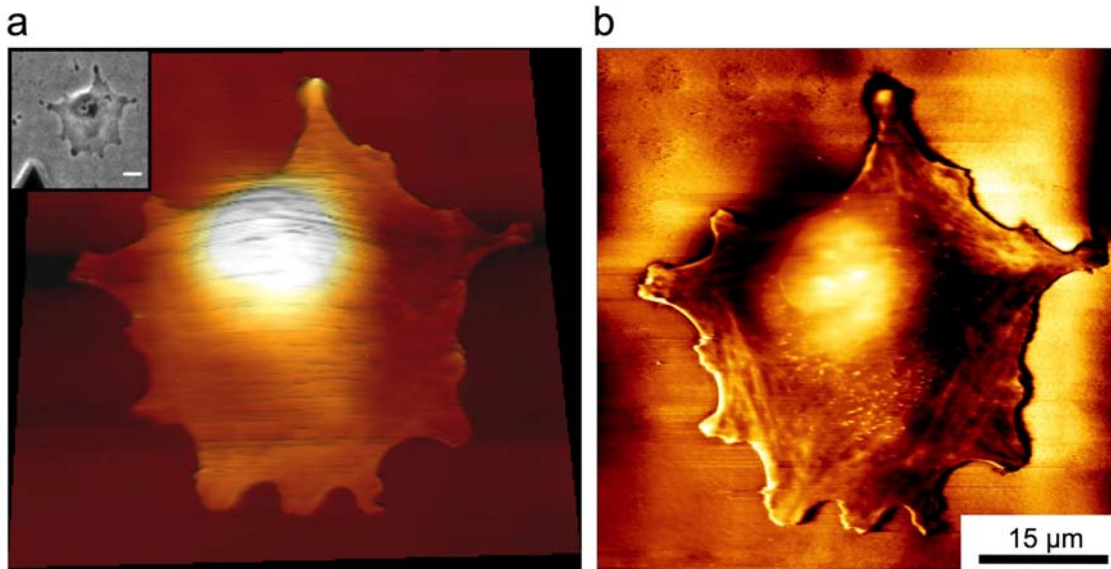

**Supplemental Figure 2.** Atomic force micrographs of living REF52-YFP-Paxillin fibroblast adhering to PEG-700-DA hydrogel. (a) displays a three-dimensional image of the height signal, 70  $\mu\text{m}$  x 70  $\mu\text{m}$  scan,  $z_{max} = 1.3 \mu\text{m}$ . The inset shows a phase contrast micrograph of the same cell during the scan, scale bar is 15  $\mu\text{m}$ . (b) shows the corresponding phase image.
